# Supplementary material for: Intronic locus determines SHROOM3 expression and potentiates renal allograft fibrosis
Source: JCI journal article supplement (doi:10.1172/jci76902), 2014-11-30
Supplement: sd1 [file 1]

**a**

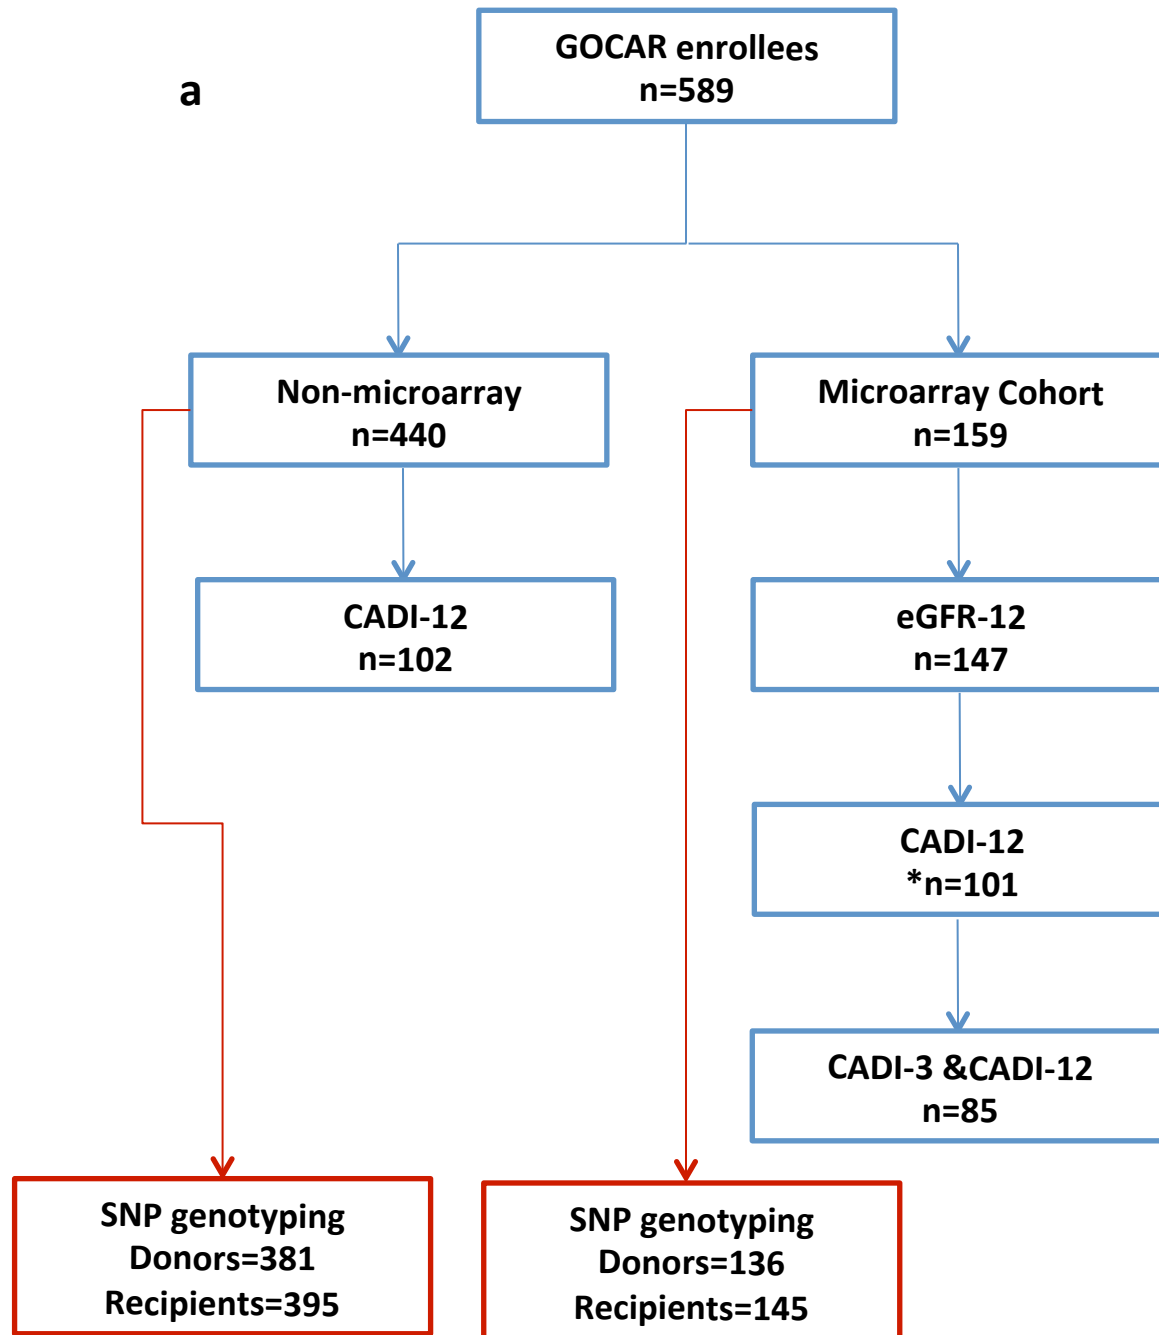

**Suppl Fig 1a.**

Of 589 GoCAR enrollees, 159 patients had 3-month allograft biopsy RNA extracted for microarray based upon date of enrollment into the study and consent for 3-month biopsy. Among these 159 patients, at 12-months post transplant, 147 had eGFR-12, 101 had CADI-12, 85 had CADI-3 and CADI-12 reported. Reasons for not having a 12-month biopsy included graft loss (n=8), death (n=1), lost-to-follow up (n=9), contraindication for or inability to obtain a renal allograft biopsy (n=40). In the non-microarray cohort, 102/439 have CADI-12 scored till Jan 2013. [\*80/101 with CADI-12 were Caucasian-donor allografts].

**b**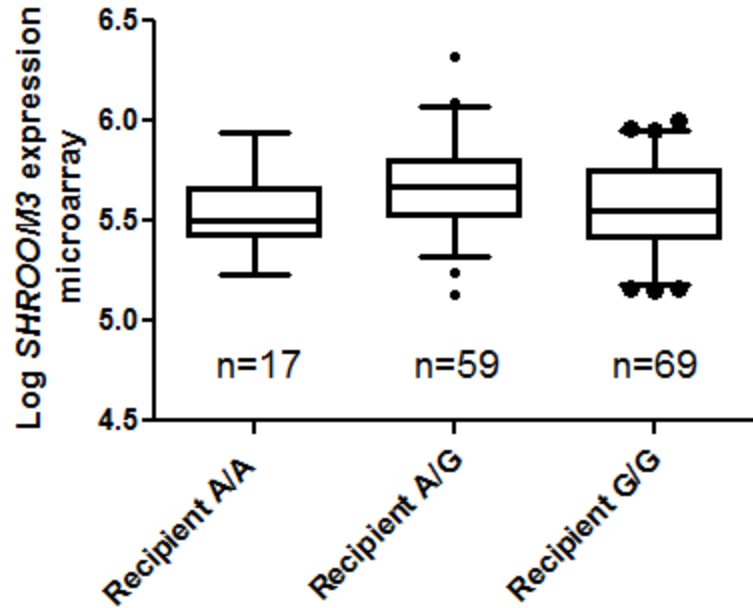**c**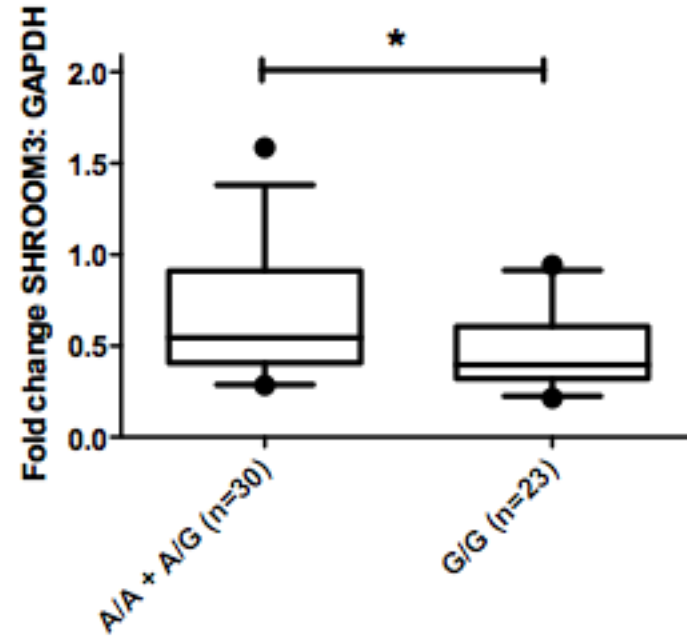

**Suppl Fig 1b-c:**(b) Box plots compare SHROOM3-3M (microarray) to corresponding recipient SHROOM3 SNP genotype; and (c) compares SHROOM3-expression (normalized to GAPDH) at 3-months with corresponding SHROOM3 allele-type; (whiskers: 5<sup>th</sup>-95<sup>th</sup> percentile; Line at Median; ANOVA p>0.05). An allograft with intermediate SHROOM3-expression was arbitrarily selected as control sample (Fold Change = 1)

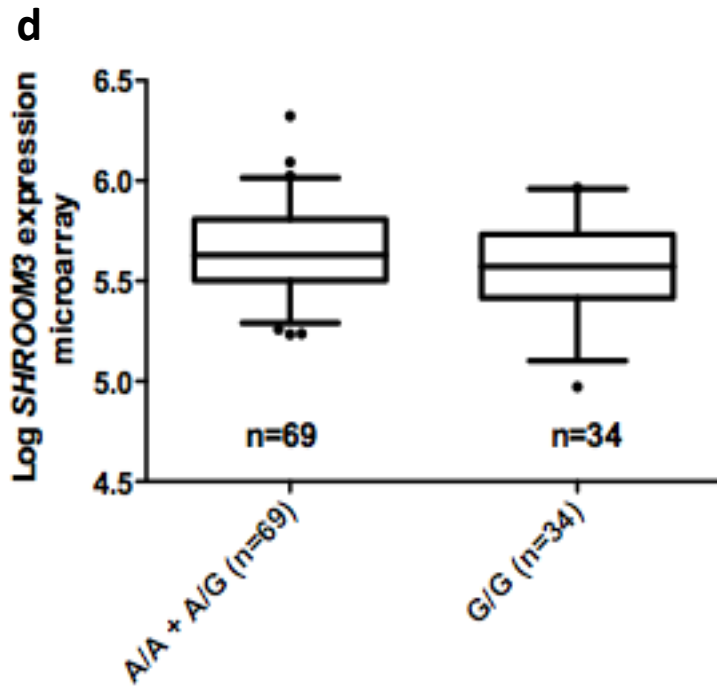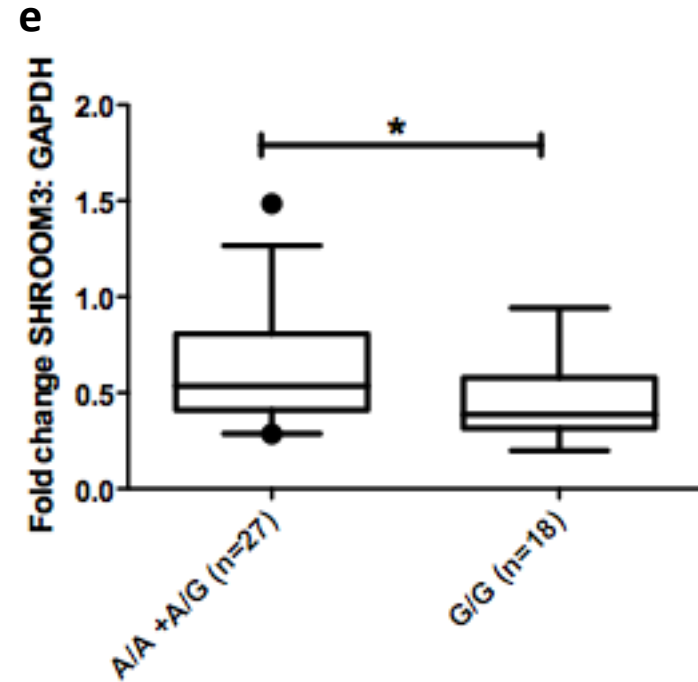

**Suppl Fig 1d-e: Donor rs17319721 genotype is associated with increased SHROOM3-3M by RTPCR in Caucasian-donor allografts.**

Box plots compare SHROOM3-expression (normalized to GAPDH) at 3-months with corresponding SHROOM3 allele-type in Caucasian-donor allografts by (f) microarray [ $p=0.05$ ] and (g) by RTPCR. (whiskers: 5<sup>th</sup>-95<sup>th</sup> percentile; Line at Median; \*Mann-Whitney  $p<0.05$ ). An allograft with intermediate SHROOM3-expression was arbitrarily selected as control sample (Fold Change = 1)

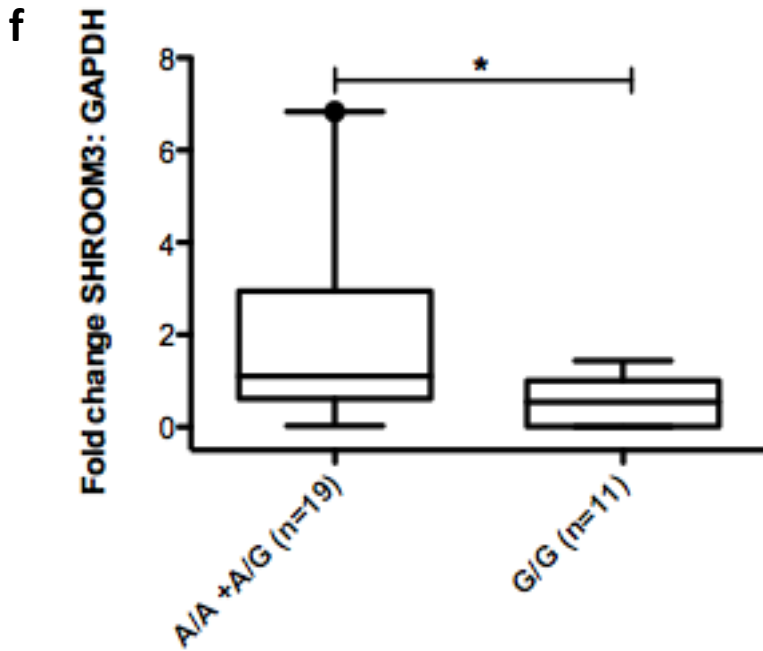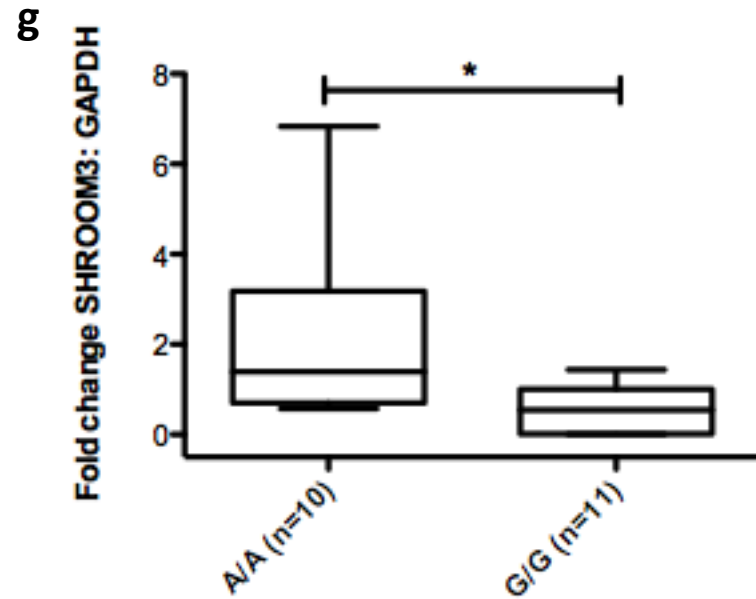

**Suppl Fig 1f-g: Donor rs17319721 genotype is associated with increased SHROOM3-0M by RTPCR.**

Box plots compare SHROOM3-expression (normalized to GAPDH) at (d) baseline with corresponding SHROOM3 allele-type; while (e) compares SHROOM3-expression at baseline between Donor A/A and G/G genotypes (whiskers: 5<sup>th</sup>-95<sup>th</sup> percentile; Line at Median; \*Mann-Whitney  $p < 0.05$ ). An allograft with intermediate baseline SHROOM3-expression was arbitrarily selected as control sample (Fold Change = 1)

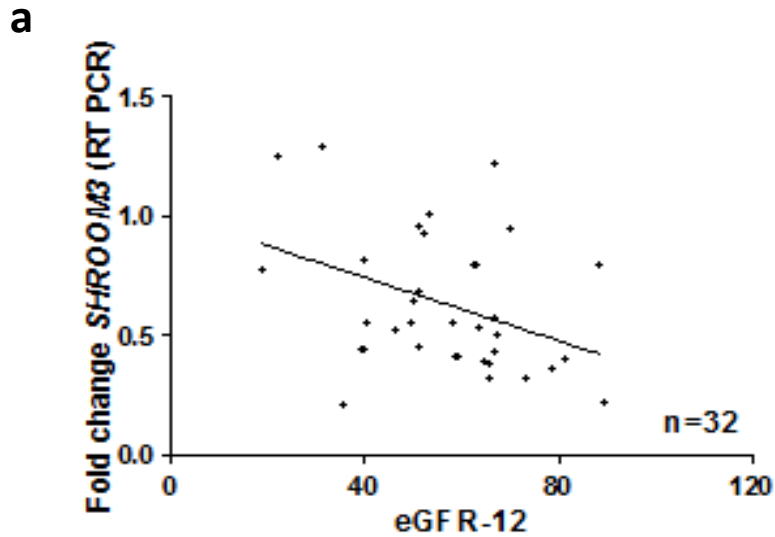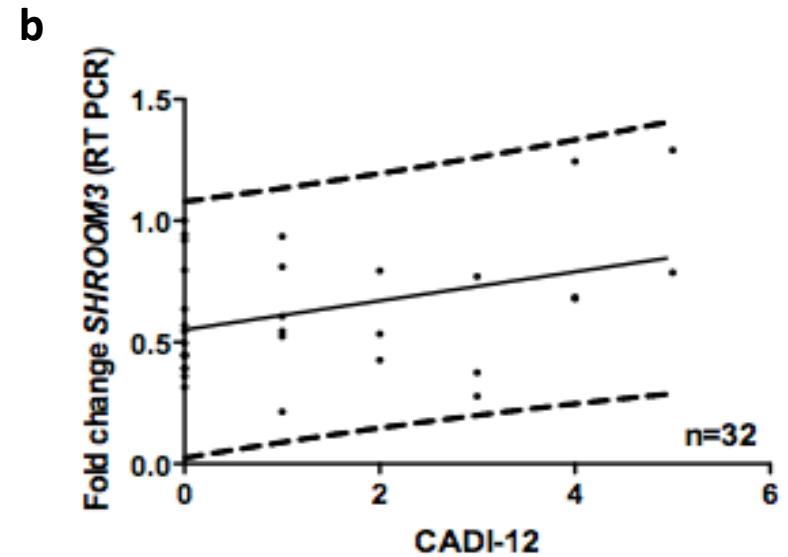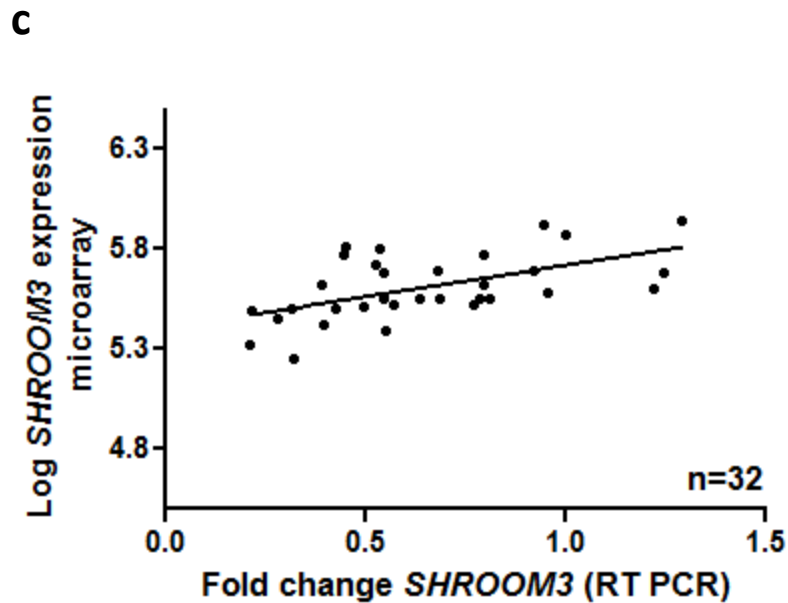

**Suppl Fig 2a-c: RT-PCR validation of *SHROOM3*-3M and outcomes**

a: Correlation of Fold change *SHROOM3* expression (normalized to GAPDH by RT-PCR) at 3 months and eGFR creatinine at 12 months ( $r=0.32$ ;  $p=0.04$ ). b: Correlation of Fold change *SHROOM3* expression (RT-PCR) at 3 months and CADI-12 months ( $r = 0.42$ ;  $p=0.01$ ) [Dotted lines represent 95% CI for Fold-change *SHROOM3*]. c: Correlation between *SHROOM3*-3M and Fold change *SHROOM3* at 3 months (by RT PCR) ( $r = 0.56$ ;  $p<0.001$ ) An allograft with intermediate *SHROOM3*-expression was arbitrarily selected as control sample (Fold Change = 1) in each analysis.

**d**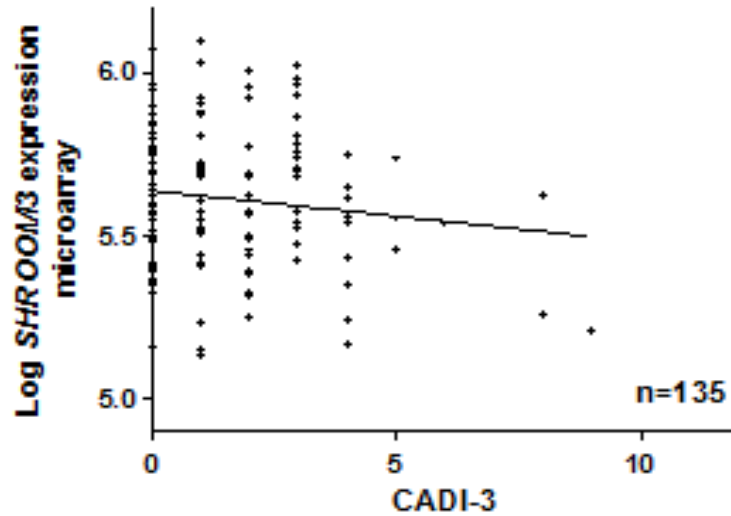**e**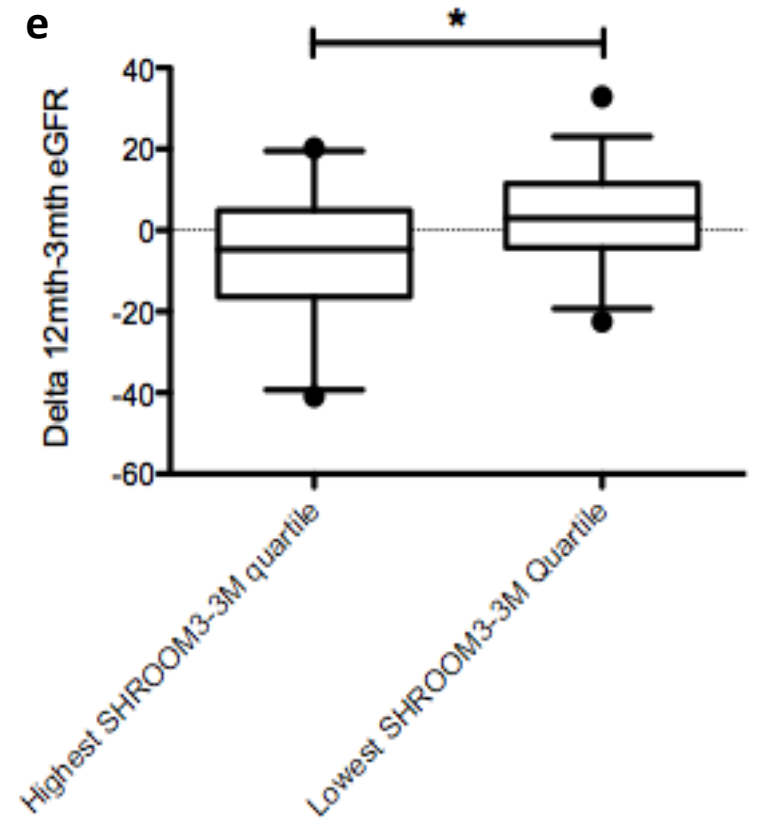

**Suppl Fig2d-e: (d)** Correlation between SHROOM3-3M and simultaneous CADI (3-month CADI score) ( $r=-0.1273$ ,  $P=0.14$ )

**(e)** Box plots show Delta-eGFR between allografts in the highest (n=23) versus the lowest (n=31) quartiles of SHROOM3-3M. (whiskers: 5<sup>th</sup>-95<sup>th</sup> percentile; Line at Median; \*Mann-Whitney  $p<0.05$ )

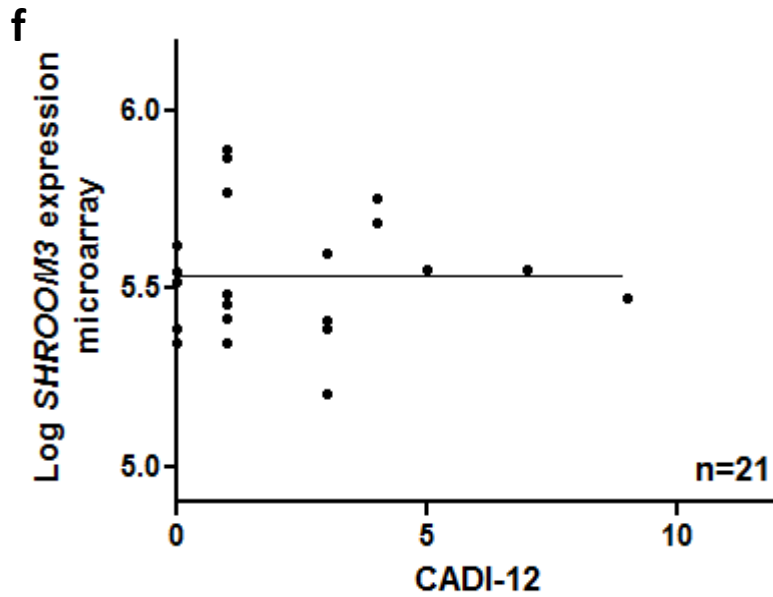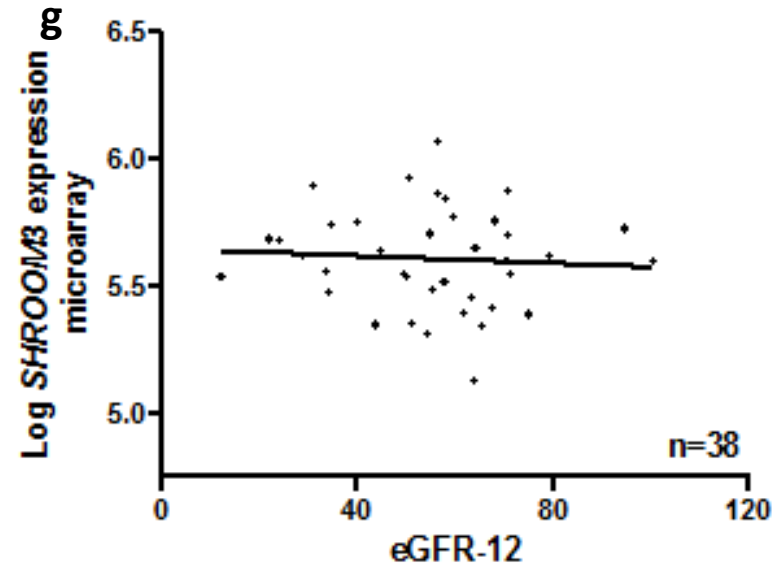

**Suppl Fig 2f-g:**

e: Correlation lines between SHROOM3-3M and eGFR-12 and, f: CADI-12 in non-Caucasian allografts is shown [p=ns]

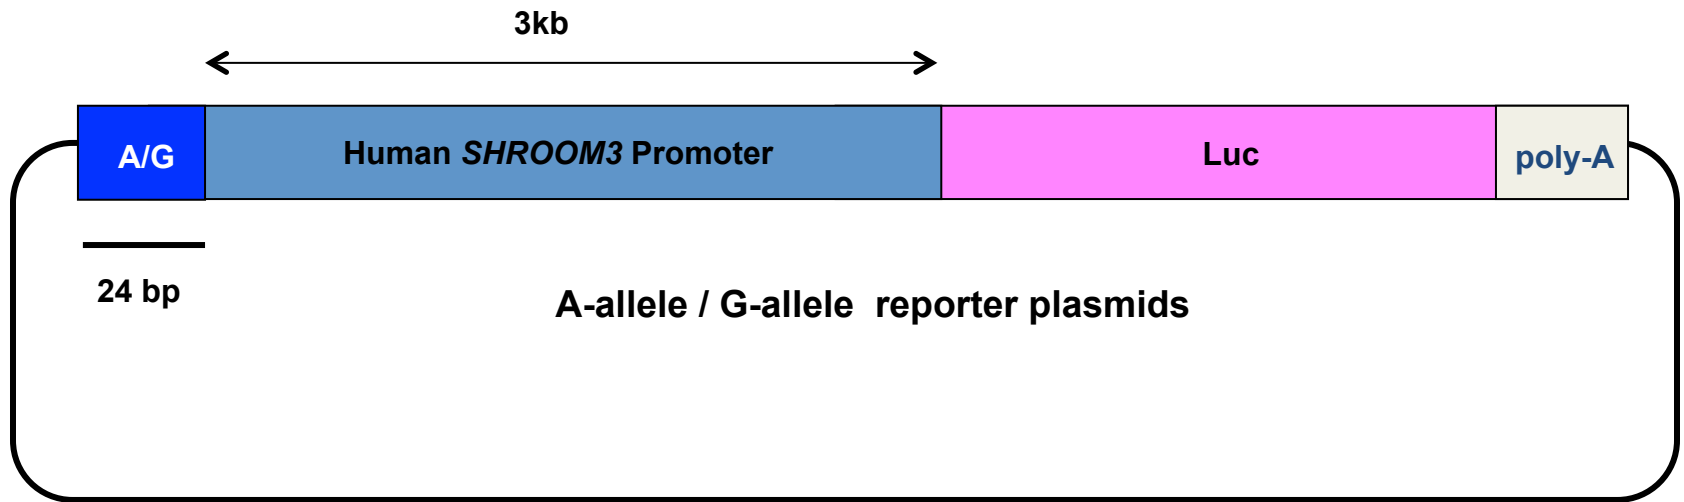

### Suppl Fig 3: Luciferase reporter plasmids: Promoter-Enhancer construct design

Promoter fragments spanning -3000 bases 5' of the translation start site of *SHROOM3* were PCR amplified using primer sets that optionally included 24-bp sequences of the intron-1 of *SHROOM3* including the rs17319721 site containing either of the two alleles (A or G) (labelled A/G in figure). The PCR products were then cloned into luciferase reporter vector-pGL3 Basic (E-1751, Promega, WI, USA) using Restriction endonuclease (Kpn I and Hind III) sites (Suppl Table 3b).



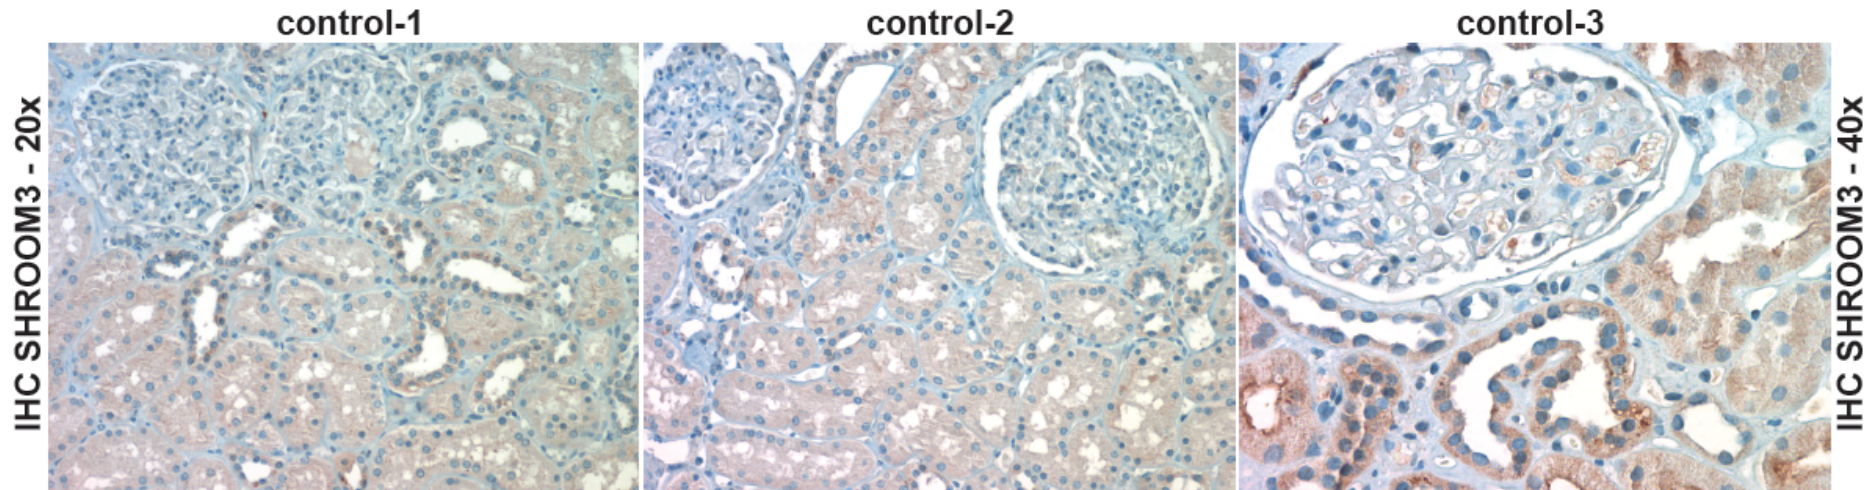

#### **Supplemental Fig 4: Tubular localization of SHROOM3 in kidney sections**

Paraffinized sections from healthy donor control kidneys were deparaffinized and treated with citrate buffer (pH-6). Immunohistochemistry was performed using rabbit polyclonal anti-SHROOM3 antibody with biotinylated goat anti-rabbit IgG followed by Streptavidin HRP. 20x- and 40x-images are displayed with hematoxylin counterstain.

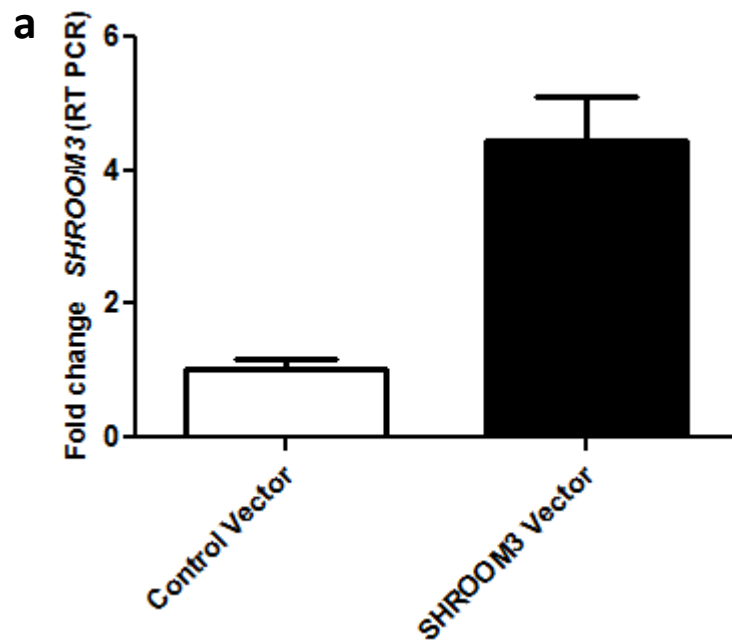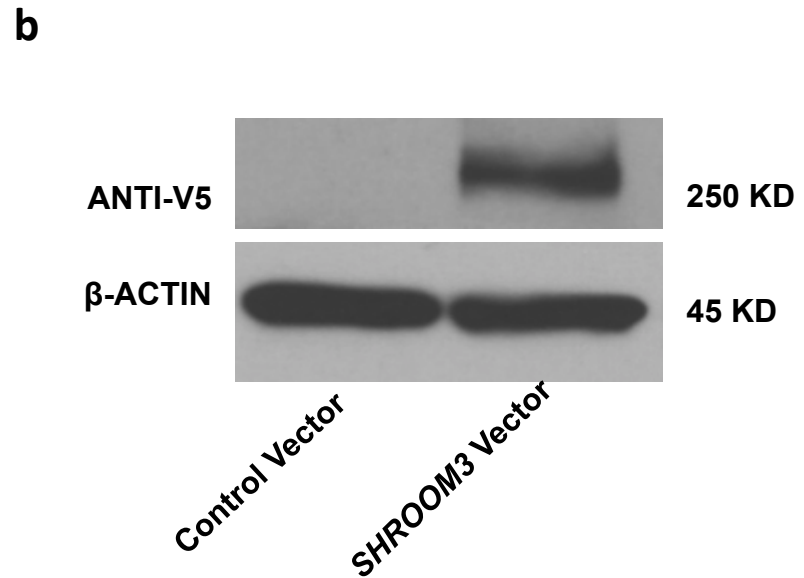

**Suppl Figure 5a-b: *SHROOM3* overexpression by PC-*SHROOM3* was confirmed by RT-PCR and Western blot.**

*SHROOM3* overexpression with PC-*SHROOM3* transfection was achieved by electroporation in PRCEC. (5a) Bar graph compares fold change *SHROOM3* mRNA by RT-PCR in Control-transfected PRCEC to PC-*SHROOM3* transfected cells after 36-hours of transfection (normalized to *HGAPDH*; after DNase digestion). (5b) Figure displays Western blots of *SHROOM3* (Anti-V5 tag antibody) and  $\beta$ -ACTIN from PRCEC lysates 48-hours after transfection [error bars = mean $\pm$ SEM]

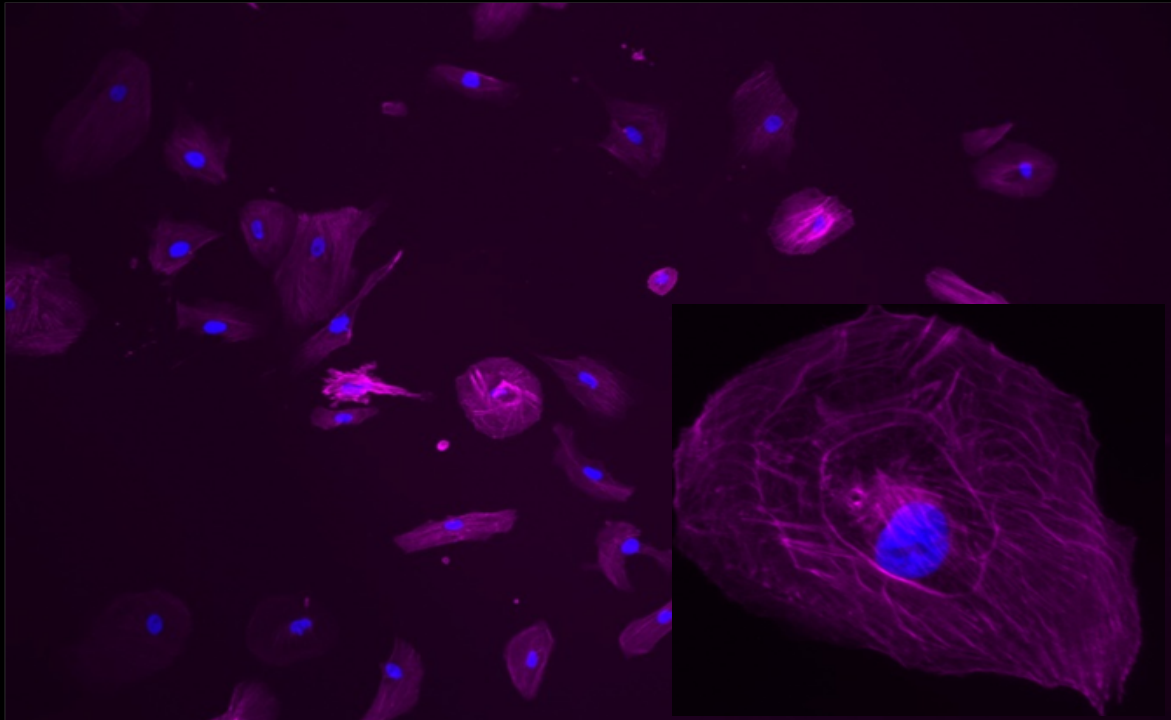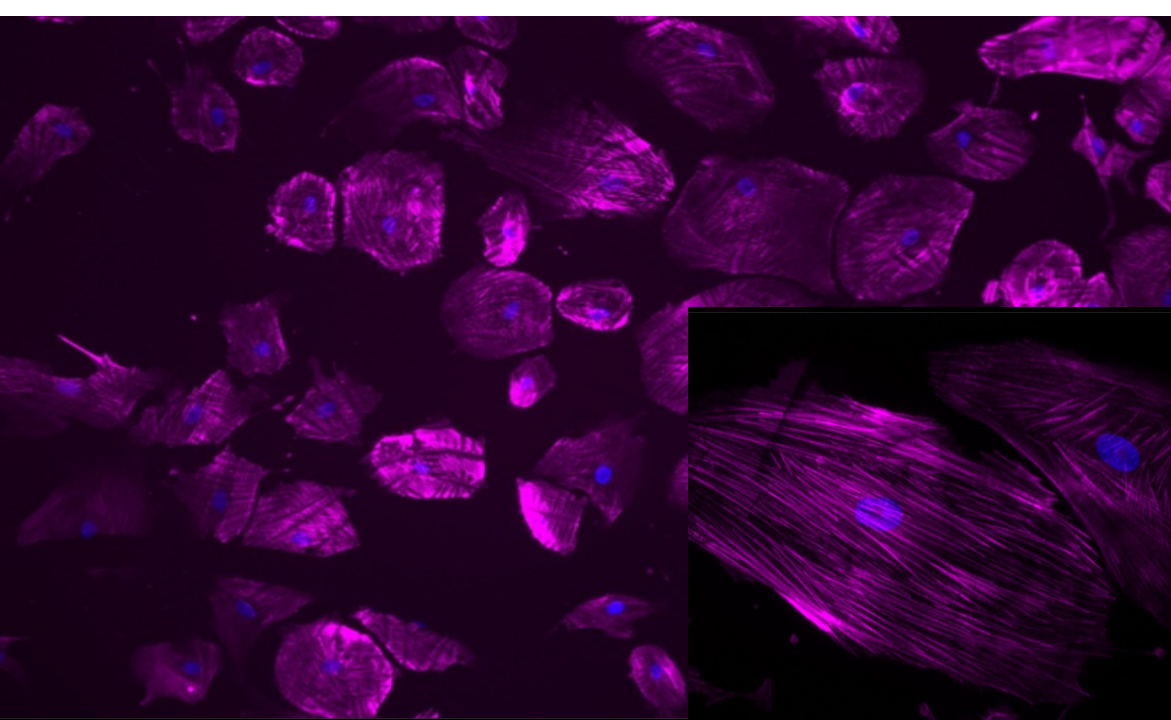

**Suppl Figure 5c: *SHROOM3* overexpression causes changes in cytoskeletal organization of PRCEC at 36-hours:**

Upper and lower Panels: F-Actin staining in PRCEC: *SHROOM3*-transfected cells (lower panel and inlay) and Control-transfected cells (upper panel and inlay) grown on collagen-coated coverslips for 36-hours, formaldehyde-Triton X fixed, and stained with Phalloidin (Alexa-Fluor 647 Phalloidin, Invitrogen) are depicted (inlay- 40x magnification)

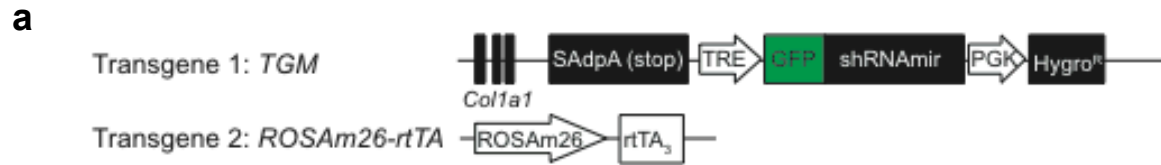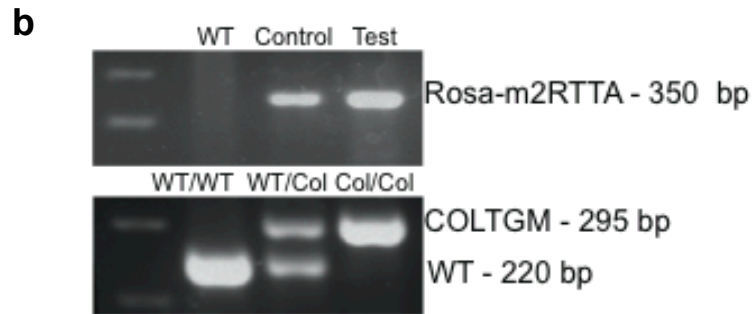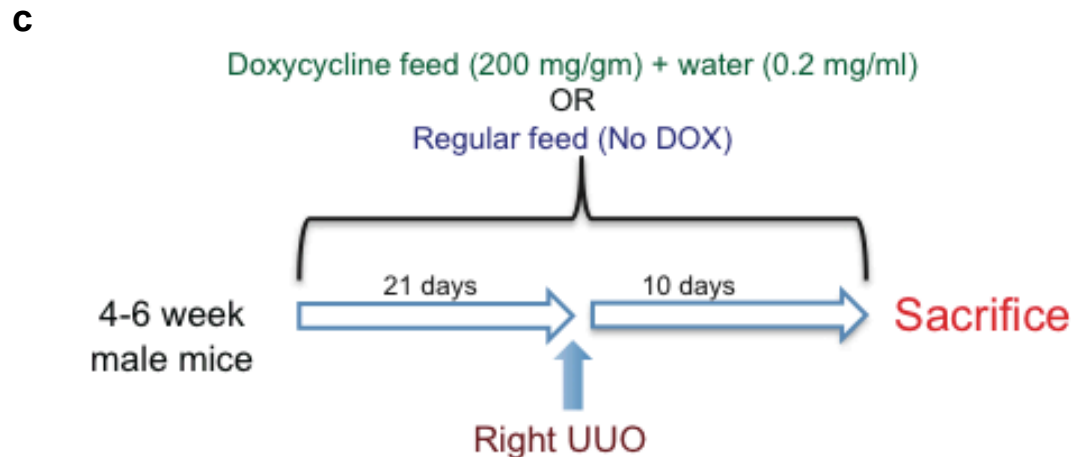

## Suppl Fig 6 a-c: Murine model of inducible *Shroom3* knockdown

**a:** Doxycycline (DOX) inducible shRNA-mediated *Shroom3* knockdown mice (C57B6/129B background) were generated in collaboration with Mirimus, inc. NY.

**b:** Representative genotyping results for ROSA-m26RTTA (upper) and COLTGM (lower) are depicted. Double-transgenic ROSA-rtTA-*Shroom3*-RNAi mice were selected for experiments. In these, shRNAmir-mediated knockdown was driven by the universal promoter, ROSAm26 and inducible by DOX-feeding.

**c:** Male mice were DOX-fed for 3 weeks, and subjected to Unilateral Ureteric obstruction surgery (UUO) at 6-8 weeks age to stimulate kidney fibrosis. Non DOX-fed littermates with UUO were used as controls. After 10-days kidney tissues were collected for histology, immunostaining for fibrosis markers, RNA isolation for RTPCR, protein extraction for WB, and IHC.

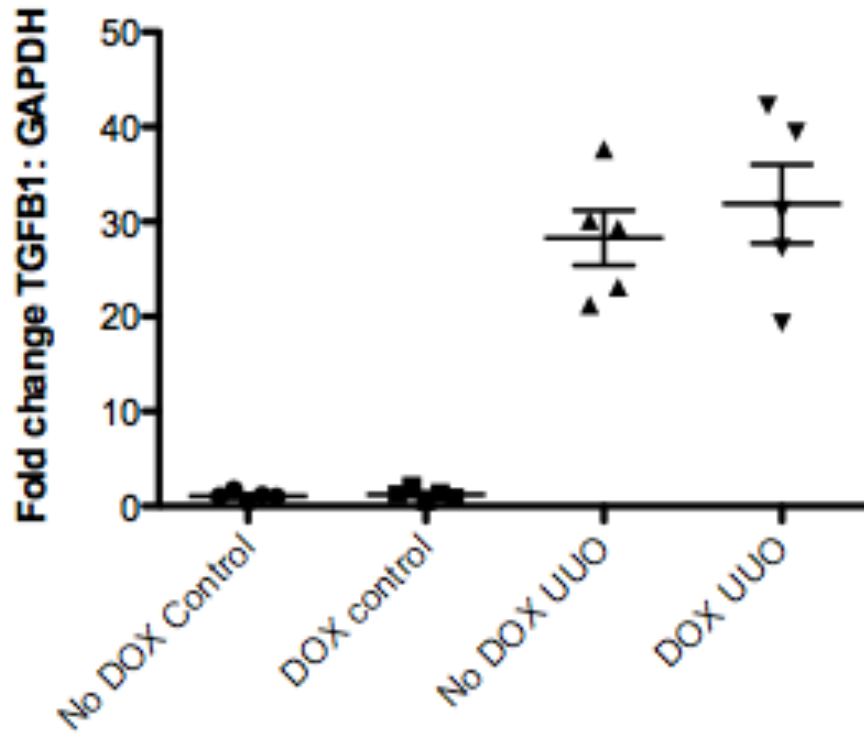

**Suppl Fig 6d:** Graph compares TGF $\beta$ 1 mRNA levels (expressed as Fold change normalized to GAPDH) between control- and UUO- kidneys of DOX-fed and Non-DOX-fed Rosa-RTTA/Shroom3 RNAi animals (n=5 pairs)[Line/Whiskers represent Mean/SEM in each group]

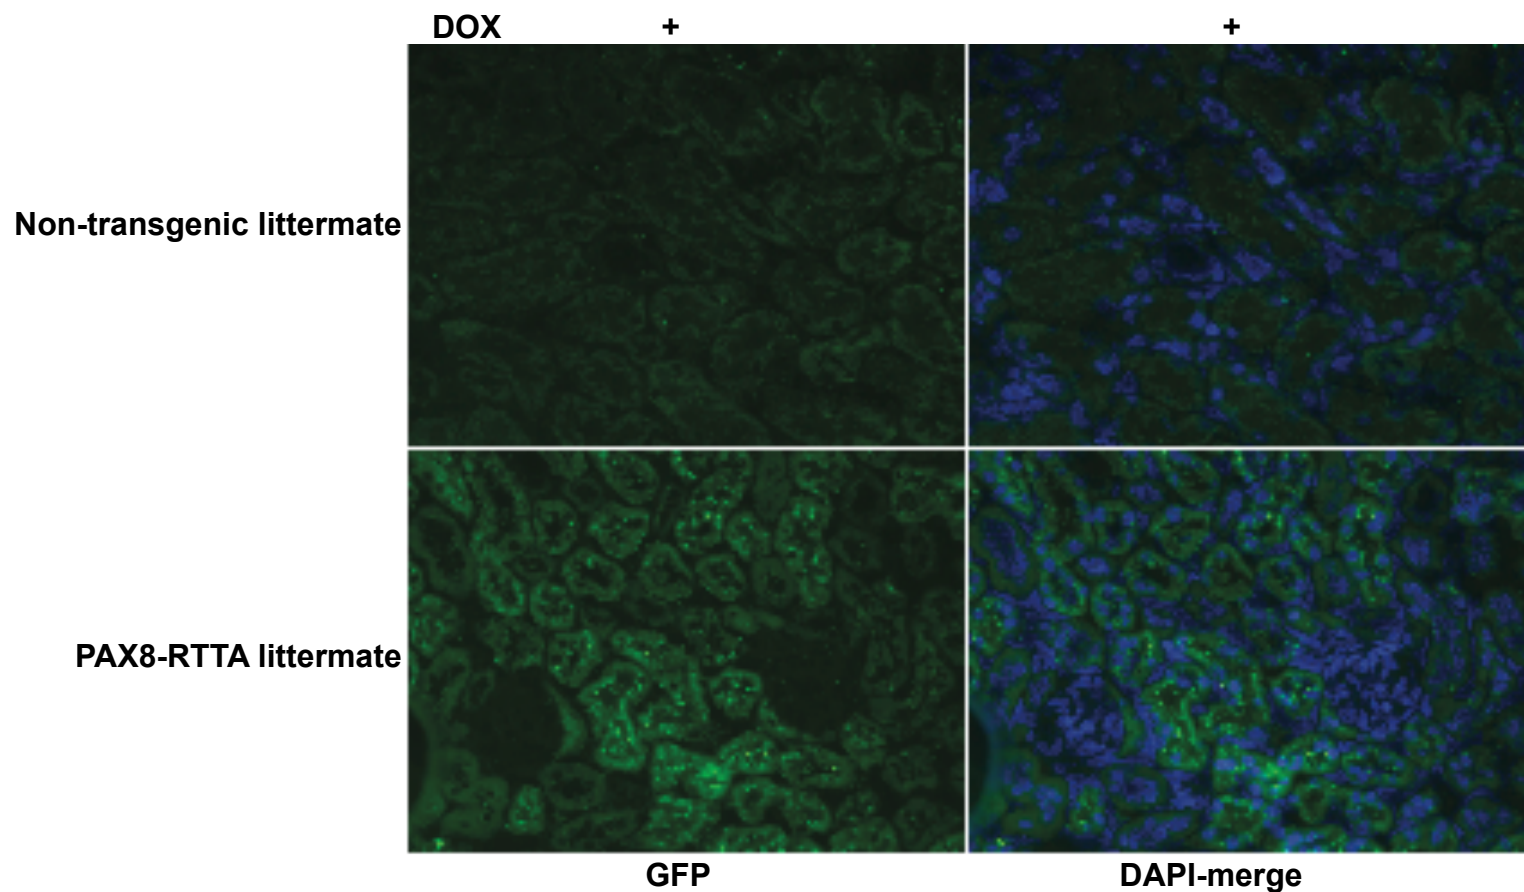

**Suppl Fig 7:** Control kidneys of PAX8-RTTA mice show GFP production exclusively in the tubular cells (sparing the glomerulus) with 3-weeks of DOX feeding in PAX8-RTTA transgenic animals (lower figures), but not in non-transgenic littermates.

Supplementary Table 1: Multivariate analysis with SHROOM3-3M as predictor CADI-12  $\geq 2$  as outcome measure.

| Covariates          | All Donors |         | Caucasian Donors |         | Deceased donors |         | Caucasian DDs |         |
|---------------------|------------|---------|------------------|---------|-----------------|---------|---------------|---------|
|                     | OR         | p-value | OR               | p-value | OR              | p-value | OR            | p-value |
| <i>SHROOM3-3M</i> * | 1.269      | 0.0351  | 1.344            | 0.0235  | 2.040           | 0.0036  | 2.124         | 0.0062  |
| Recipient Age       | 1.002      | 0.9127  | 1.005            | 0.8165  | 1.029           | 0.3450  | 1.034         | 0.3496  |
| Recipient Gender    | 3.760      | 0.0110  | 4.979            | 0.0127  | 16.834          | 0.0065  | 12.095        | 0.0218  |
| Recipient Race      | 0.603      | 0.2874  | 0.449            | 0.2377  | 0.343           | 0.2070  | 0.413         | 0.4444  |
| Acute Rejection     | 2.714      | 0.0338  | 3.043            | 0.0494  | 12.407          | 0.0072  | 20.313        | 0.0077  |
| Cold-Ischemia time  | NA         | NA      | NA               | NA      | 1.048           | 0.5100  | 1.163         | 0.1168  |

\*OR for SHROOM3-3M corresponds to a 0.1 unit increase in allograft Log-*SHROOM3* expression

Supplementary Table 2: Multivariate analysis with SHROOM3-3M as predictor and eGFR-12 as outcome measure

| Covariate           | All Donors |         | Caucasian Donors |         | Deceased donors |         | Caucasian DDs |         |
|---------------------|------------|---------|------------------|---------|-----------------|---------|---------------|---------|
|                     | Estimate   | p-value | Estimate         | p-value | Estimate        | p-value | Estimate      | p-value |
| <i>SHROOM3-3M</i> * | -1.59      | 0.0227  | -1.94            | 0.0159  | -2.00           | 0.0531  | -2.30         | 0.0315  |
| Recipient Age       | -0.21      | 0.0729  | -0.28            | 0.0398  | -0.38           | 0.0326  | -0.48         | 0.0132  |
| Recipient Gender    | 1.58       | 0.6425  | 1.28             | 0.7684  | 0.79            | 0.8806  | 1.76          | 0.7562  |
| Recipient Race      | -10.72     | 0.0044  | -9.68            | 0.0666  | -15.69          | 0.0047  | -9.84         | 0.1311  |
| Acute Rejection     | -7.62      | 0.0233  | -10.53           | 0.0114  | -9.56           | 0.0786  | -11.82        | 0.0578  |
| Cold-Ischemia       | NA         | NA      | NA               | NA      | 0.05            | 0.8931  | -0.36         | 0.3884  |

\* Estimate for SHROOM3-3M corresponds to a 0.1 unit increase in allograft Log-*SHROOM3* expression



Supplementary table 3: Presence of one or two copies of the risk-allele (A) at rs1739721 is associated with significantly greater risk of CADI-12 $\geq$ 2.

| Allografts with CADI_12 scored | Total n | Donor Genotype- A/A and A/G |                    | Donor Genotype- G/G |                    | OR-CADI-12 $\geq$ 2 (95% CI) (A/A+A/G Vs G/G) | p-value |
|--------------------------------|---------|-----------------------------|--------------------|---------------------|--------------------|-----------------------------------------------|---------|
|                                |         | CADI-12<2 n                 | CADI-12 $\geq$ 2 n | CADI-12<2 n         | CADI-12 $\geq$ 2 n |                                               |         |
| All Donors                     | 203     | 63                          | 67                 | 47                  | 26                 | 1.98 (1.10-3.59)                              | 0.028*  |
| All LDs <sup>#</sup>           | 106     | 34                          | 40                 | 27                  | 7                  | 4.54 (1.76-11.72)                             | 0.001*  |
| All DDS <sup>**</sup>          | 97      | 29                          | 29                 | 20                  | 19                 | 1.05 (0.47-2.45)                              | 0.9     |
| Caucasian-Donors               | 165     | 53                          | 57                 | 34                  | 21                 | 1.74 (0.89-3.37)                              | 0.09    |
| Caucasian-Donors LDs           | 61      | 29                          | 32                 | 4                   | 16                 | 5.41 (1.56-18.39)                             | 0.004*  |
| Caucasian-Donor DDS            | 94      | 24                          | 25                 | 18                  | 17                 | 1.10 (0.46-2.62)                              | 0.89    |
| Non-Caucasian-Donors           | 38      | 10                          | 10                 | 13                  | 5                  | 2.6 (0.67-10.07)                              | 0.16    |
| Non-Caucasian-Donor LDs        | 25      | 5                           | 6                  | 11                  | 3                  | 4.4 (0.77-25.16)                              | 0.08    |
| Non-Caucasian-Donor DDS        | 13      | 5                           | 4                  | 2                   | 2                  | 0.80 (0.07-8.48)                              | 1.0     |

#LDs- Live donors, \*\*DDS-Deceased donors, \*P<0.05 Chi-square

Supplementary Table 4: Prediction of CADI-12 $\geq$ 2 and Delta CADI $\geq$ 2 with logistic models including clinical predictors with/without SHROOM3-3M

| OUTCOME- CADI-12 $\geq$ 2                                                                     | AUC          |                 |
|-----------------------------------------------------------------------------------------------|--------------|-----------------|
|                                                                                               | With Shroom3 | Without Shroom3 |
| <b>All Donors</b>                                                                             |              |                 |
| Covariates: Recipient Age, Recipient Gender, Recipient White, Acute rejection before 3 months | 0.73         | 0.70            |
| <b>Caucasian Donors</b>                                                                       |              |                 |
| Covariates: Recipient Age, Recipient Gender, Recipient White, Acute rejection before 3 months | 0.77         | 0.73            |
| <b>OUTCOME – CADI-progressors</b>                                                             |              |                 |
| <b>All Donors</b>                                                                             |              |                 |
| Covariates: Recipient Age, Recipient Gender, Recipient White, Acute rejection before 3 months | 0.77         | 0.72            |
| <b>Caucasian Donors</b>                                                                       |              |                 |
| Covariates: Recipient Age, Recipient Gender, Recipient White, Acute rejection before 3 months | 0.81         | 0.74            |

Supplementary Table 5: Genes significantly upregulated and co-expressed in 3-month biopsies of patients in highest quartile of SHROOM3-3M when compared to lowest quartile of SHROOM3-3M.

| <b>Gene Symbol</b> | <b>Probe ID</b> | <b>Gene name</b>                | <b>Log2 Ratio</b> | <b>P-value</b> | <b>*Adjusted P-value</b> |
|--------------------|-----------------|---------------------------------|-------------------|----------------|--------------------------|
| TCF7L2             | 3264621         | T-cell factor 7 like-2          | 0.73              | 1.37E-10       | 1.30E-09                 |
| COL4A1             | 3525313         | Collagen-IV                     | 0.44              | 1.04E-06       | 6.61E-06                 |
| CTNNB1             | 2618940         | $\beta$ -catenin                | 0.43              | 0.001          | 0.007                    |
| VIM                | 3236958         | Vimentin                        | 0.29              | 0.003          | 0.014                    |
| FGF1               | 2879166         | Fibroblast growth factor-2      | 0.39              | 0.008          | 0.026                    |
| CTGF               | 2974330         | Connective tissue growth factor | 0.22              | 0.014          | 0.039                    |

\* P-values are adjusted for multiple testing

Supplementary Table 6: Primer sequences used in Luciferase promoter-enhancer cloning protocols and Probe sequences used for EMSA.

| <b>Constructs</b>                  | <b>Forward (5'—3')</b>                                              | <b>Reverse (5'-3')</b>                             |
|------------------------------------|---------------------------------------------------------------------|----------------------------------------------------|
| Wild-type (promoter only)          | TTATAGGTACCTTGAGACAATAGAGTTGCC                                      | TTAAGCTTCCATGCCAAACACATGATCCCTC                    |
| A-allele enhancer sequence (24 bp) | TTTGGTACCGAGTAGCAGGGCAAAAACAA-<br><b>-AAGCCCTTGAGACAATAGAGTTGCC</b> | TTAAGCTTCCATGCCAAACACATGATCCCTC                    |
| G-allele enhancer sequence (24 bp) | TTTGGTACCGAGTAGCAGGGCAAAAACAA-<br><b>-AGGCCCTTGAGACAATAGAGTTGCC</b> | TTAAGCTTCCATGCCAAACACATGATCCCTC                    |
| <b>EMSA Probes</b>                 | <b>Sense (5'—3')</b>                                                | <b>Antisense(5'—3')</b>                            |
| HSHM3EMSA-A-PN2<br>F & R           | <b>GG</b> TAGCAGGGCAA <b>AAACAAGC</b> AGCCATTGATCT                  | <b>GG</b> AGATCAATGGCTGCTTTGTTTTTGCCTGCTA          |
| HSHM3EMSA-G-PN2<br>F & R           | <b>GG</b> TAGCAGGGCAA <b>AAACAAGGC</b> AGCCATTGATCT                 | <b>GG</b> AGATCAATGGCTGC <b>CTT</b> GTTTTTGCCTGCTA |

**Legend:** KpnI was introduced in all forward primer and Hind III in the Reverse ones (underlined). Human promoter sequences in initiation and SNPs sequences in bold. SNP-position is in Red.

Highlighted in blue – Exogenous (non-intronic) sequence for P<sup>32</sup>Cytidine labelling

Highlighted in yellow – Consensus binding site for TCF7L2 (A or G in bold lettering)

Supplementary Table 7: Multivariate analysis with SHROOM3-3M as predictor CADI-12  $\geq 2$  as outcome measure, adding CTGF-levels as a covariate.

| Covariates                  | All Donors |         | Caucasian Donors |         | Deceased donors |         | Caucasian DDs |         |
|-----------------------------|------------|---------|------------------|---------|-----------------|---------|---------------|---------|
|                             | OR         | p-value | OR               | p-value | OR              | p-value | OR            | p-value |
| <i>SHROOM3-3M</i> *         | 1.248      | 0.0561  | 1.337            | 0.0327  | 2.072           | 0.0045  | 2.022         | 0.0140  |
| Recipient Age               | 1.002      | 0.8894  | 1.005            | 0.8280  | 1.031           | 0.3402  | 1.021         | 0.5829  |
| Recipient Gender (Female)   | 3.692      | 0.0126  | 4.854            | 0.0168  | 17.752          | 0.0075  | 9.505         | 0.0410  |
| Recipient Race              | 0.562      | 0.2342  | 0.440            | 0.2345  | 0.344           | 0.2084  | 0.464         | 0.5200  |
| Acute Rejection (<3 months) | 2.619      | 0.0411  | 3.035            | 0.0499  | 12.688          | 0.0073  | 20.691        | 0.0073  |
| Cold-Ischemia time (hours)  | NA         | NA      | NA               | NA      | 1.042           | 0.5825  | 1.216         | 0.0979  |
| CTGF                        | 1.039      | 0.3555  | 1.008            | 0.8690  | 0.984           | 0.8342  | 1.074         | 0.4487  |

\*OR for SHROOM3-3M corresponds to a 0.1 unit increase in allograft Log-*SHROOM3* expression

Supplementary Table 8: Primer sequences used in RT-PCR

| Gene name      | Forward primer (5' → 3') | Reverse primer (5' → 3') |
|----------------|--------------------------|--------------------------|
| <b>HGAPDH</b>  | TGTTGCCATCAATGACCCCTT    | CTCCACGACGTA CT CAGCG    |
| <b>SHROOM3</b> | CCCTCTCGGGGCGTCTAGCC     | GCCCAGCACTACTCGCTCCC     |
| <b>COL1A1</b>  | GATGGTGAAGATGGTCCCAC     | GGCCAAGTCCA ACTCCTTTT    |
| <b>TCF7L2</b>  | GCCTCTTATCACGTACAGCAAT   | GCCAGGCGATAGTGGGTAAT     |
